# Supplementary material for: CHD9 upregulates RUNX2 and has a potential role in skeletal evolution
Source: PubMed Central journal article supplement (PMC7161146; doi:10.1186/s12860-020-00270-5), 2020-04-15
Supplement: 12860_2020_270_MOESM1_ESM.pdf [file 12860_2020_270_MOESM1_ESM.pdf]

| Primer                      | F primer (5' – 3')                           | R Primer (5' – 3')                             |
|-----------------------------|----------------------------------------------|------------------------------------------------|
| <i>CHD9</i> 5' amplicon     | ATGACAGACCCAATGATGGACT<br>TTTTTGAT           | CGATGGCGAGAGATCCTGTC                           |
| <i>CHD9</i> 3' amplicon     | TTGACCGAGCCAGCTTGAAA                         | GAGGACTCAGACTCGAGCAAT<br>GAAGACTGA             |
| <i>H.s CHD9</i> qPCR        | ACCAAATCTGTTGGGCATGG                         | GAGTTTTCTCCACCATTCTC                           |
| <i>M.m CHD9</i> qPCR        | ATGCGAGAAAGGTTGGAGGC                         | CACAACGGGACCAGTGAGAA                           |
| <i>H.s RUNX2</i>            | ATGTGTGTTTGTTCAGCAGCA                        | TCCCTAAAGTCACTCGGTATGT<br>GTA                  |
| <i>M.m RUNX2</i>            | CCCAGCCACCTTTACCTACA                         | TATGGAGTGCTGCTGGTCTG                           |
| <i>H.s BGLAP2</i>           | CGCCTGGGTCTCTTCACTAC                         | CTCACACTCCTCGCCCTATT                           |
| <i>M.m BGLAP2</i>           | AAGCAGGAGGGCAATAAGGT                         | TAGGCGGTCTTCAAGCCATA                           |
| <i>H.s ALP</i>              | ATGGGATGGGTGTCTCCACA                         | CCACGAAGGGGAACCTTGTC                           |
| <i>M.m ALP</i>              | AACCAGACACAAGCATTCC                          | GAGAGCGAAGGGTCAGTCAG                           |
| <i>H.s HPRT</i>             | TATGGCGACCCGCAGCCCT                          | CATCTCGAGCAAGACGTTTCAG                         |
| <i>V.vul RUNX2 promoter</i> | GAGCTCGCTAGCAGATCCTCAA<br>ACTGGTCATGAGATAAAC | ATTGGCAAGCTTAGCTTTAAAA<br>CTCCTTTTTTTTGCAAGCAC |
